# Supplementary material for: Maternal Psychological Resilience During Pregnancy and Newborn Telomere Length: A Prospective Study
Source: Atypon-hosted journal article supplement (doi:10.1176/appi.ajp.2020.19101003), 2020-09-11
Supplement: appi.ajp.2020.19101003.ds001.pdf [file appi.ajp.2020.19101003.ds001.pdf]

**TABLE S1.** Summary of adjusted models derived from linear regression

**Stress factor**

|                            | <b>B</b> | <b>SE</b> | <b>95% CI</b>  | <b>β</b> | <b>t</b> | <b>p</b> |
|----------------------------|----------|-----------|----------------|----------|----------|----------|
| Intercept                  | -1.266   | 1.066     | -3.360, 0.829  |          | -1.187   | 0.236    |
| Stress factor              | -0.079   | 0.039     | -0.155, -0.002 | -0.079   | -2.016   | 0.044    |
| DNA extraction method      | 0.074    | 0.071     | -0.065, 0.212  | 0.041    | 1.045    | 0.297    |
| Sex of the child           | 0.198    | 0.079     | 0.043, 0.353   | 0.099    | 2.501    | 0.013    |
| Gestational age at birth   | 0.028    | 0.029     | -0.030, 0.086  | 0.048    | 0.943    | 0.346    |
| Child birthweight          | 0.000    | 0.000     | 0.000, 0.000   | -0.069   | -1.352   | 0.177    |
| Maternal age at childbirth | 0.017    | 0.008     | 0.002, 0.032   | 0.095    | 2.260    | 0.024    |
| Parity                     | -0.005   | 0.043     | -0.088, 0.079  | -0.004   | -0.109   | 0.913    |
| Maternal pre-pregnancy BMI | -0.013   | 0.007     | -0.027, 0.000  | -0.084   | -1.935   | 0.053    |
| Maternal education level   | -0.049   | 0.046     | -0.139, 0.041  | -0.046   | -1.069   | 0.285    |
| Hypertension in pregnancy  | 0.150    | 0.093     | -0.033, 0.333  | 0.065    | 1.606    | 0.109    |
| Preeclampsia               | 0.234    | 0.157     | -0.074, 0.542  | 0.061    | 1.492    | 0.136    |
| Diabetes in pregnancy      | 0.000    | 0.101     | -0.197, 0.198  | 0.000    | 0.004    | 0.997    |
| Smoking in pregnancy       | -0.033   | 0.187     | -0.400, 0.335  | -0.007   | -0.174   | 0.862    |

**Positivity factor**

|                            | <b>B</b> | <b>SE</b> | <b>95% CI</b> | <b><math>\beta</math></b> | <b>t</b> | <b>p</b> |
|----------------------------|----------|-----------|---------------|---------------------------|----------|----------|
| Intercept                  | -1.348   | 1.060     | -3.430, 0.734 |                           | -1.271   | 0.204    |
| Positivity factor          | 0.134    | 0.038     | 0.059, 0.209  | 0.135                     | 3.495    | 0.001    |
| DNA extraction method      | 0.082    | 0.070     | -0.055, 0.220 | 0.045                     | 1.178    | 0.239    |
| Sex of the child           | 0.193    | 0.078     | 0.039, 0.347  | 0.097                     | 2.457    | 0.014    |
| Gestational age at birth   | 0.027    | 0.029     | -0.030, 0.085 | 0.047                     | 0.938    | 0.349    |
| Child birthweight          | 0.000    | 0.000     | 0.000, 0.000  | -0.058                    | -1.150   | 0.250    |
| Maternal age at childbirth | 0.018    | 0.008     | 0.003, 0.033  | 0.099                     | 2.369    | 0.018    |
| Parity                     | -0.013   | 0.042     | -0.096, 0.070 | -0.012                    | -0.302   | 0.763    |
| Maternal pre-pregnancy BMI | -0.013   | 0.007     | -0.026, 0.000 | -0.082                    | -1.898   | 0.058    |
| Maternal education level   | -0.051   | 0.045     | -0.140, 0.038 | -0.048                    | -1.127   | 0.260    |
| Hypertension in pregnancy  | 0.155    | 0.093     | -0.027, 0.337 | 0.067                     | 1.670    | 0.095    |
| Preeclampsia               | 0.218    | 0.156     | -0.089, 0.524 | 0.056                     | 1.395    | 0.164    |
| Diabetes in pregnancy      | -0.015   | 0.100     | -0.211, 0.180 | -0.006                    | -0.155   | 0.877    |
| Smoking in pregnancy       | -0.045   | 0.186     | -0.410, 0.320 | -0.009                    | -0.240   | 0.810    |

### Resilience factor plus neuroticism

|                            | <b>B</b>  | <b>SE</b> | <b>95% CI</b> | <b><math>\beta</math></b> | <b>t</b> | <b>p</b> |
|----------------------------|-----------|-----------|---------------|---------------------------|----------|----------|
| Intercept                  | -2.403    | 1.243     | -4.847, 0.040 |                           | -1.933   | 0.054    |
| Resilience factor          | 0.141     | 0.042     | 0.057, 0.224  | 0.148                     | 3.317    | 0.001    |
| Neuroticism                | 0.003     | 0.002     | -0.001, 0.006 | 0.068                     | 1.507    | 0.132    |
| DNA extraction method      | 0.154     | 0.077     | 0.002, 0.306  | 0.088                     | 1.990    | 0.047    |
| Sex of the child           | 0.156     | 0.087     | -0.015, 0.326 | 0.081                     | 1.788    | 0.074    |
| Gestational age at birth   | 0.033     | 0.033     | -0.033, 0.098 | 0.056                     | 0.985    | 0.325    |
| Child birthweight          | -8.902E-5 | 0.000     | 0.000, 0.000  | -0.052                    | -0.931   | 0.352    |
| Maternal age at childbirth | 0.025     | 0.008     | 0.008, 0.041  | 0.138                     | 2.918    | 0.004    |
| Parity                     | 0.027     | 0.049     | -0.070, 0.123 | 0.025                     | 0.542    | 0.588    |
| Maternal pre-pregnancy BMI | -0.007    | 0.007     | -0.022, 0.007 | -0.048                    | -0.964   | 0.336    |
| Maternal education level   | -0.026    | 0.050     | -0.125, 0.073 | -0.025                    | -0.520   | 0.603    |
| Hypertension in pregnancy  | 0.169     | 0.103     | -0.033, 0.371 | 0.076                     | 1.646    | 0.100    |
| Preeclampsia               | 0.258     | 0.173     | -0.082, 0.599 | 0.071                     | 1.490    | 0.137    |
| Diabetes in pregnancy      | -0.188    | 0.114     | -0.411, 0.036 | -0.077                    | -1.652   | 0.099    |
| Smoking in pregnancy       | -0.123    | 0.205     | -0.526, 0.281 | -0.027                    | -0.599   | 0.550    |
